# Supplementary material for: Persistent warming of the ground on the Earth’s Third Pole
Source: Copernicus journal article supplement (doi:10.5194/tc-2023-125), 2023-08-24
Supplement: Supplementary file 1 [file tc-2023-125-supplement.pdf]

1 **Supplementary Materials**

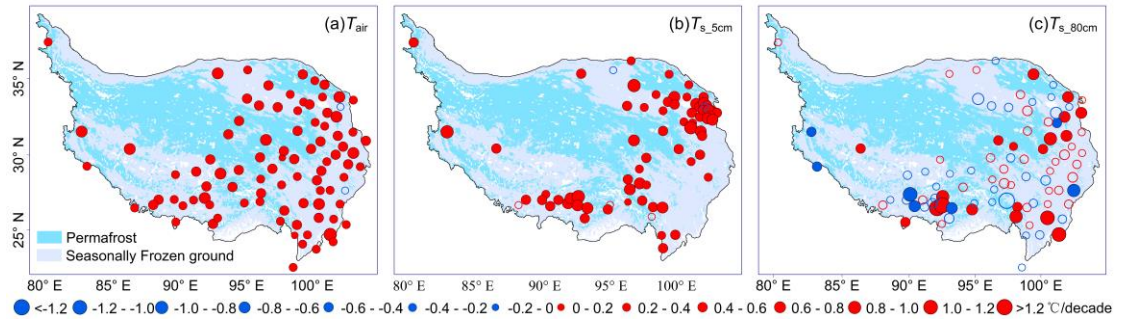

**Fig. S1.** Spatial patterns of trends in air temperature and soil temperatures at depths of 5 cm and 80cm

over the period 1981–2021.

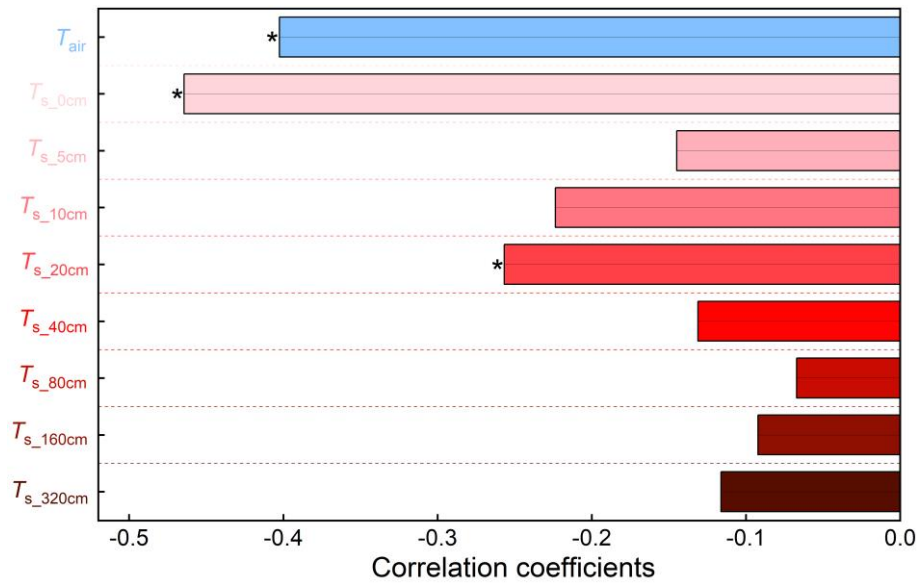

24

25 **Fig. S2.** Correlations between trends and average annual series for air temperature and layered soil

26 temperature over the period 1981–2021.

27

28

29

30

31

32

33

34

35

36

37

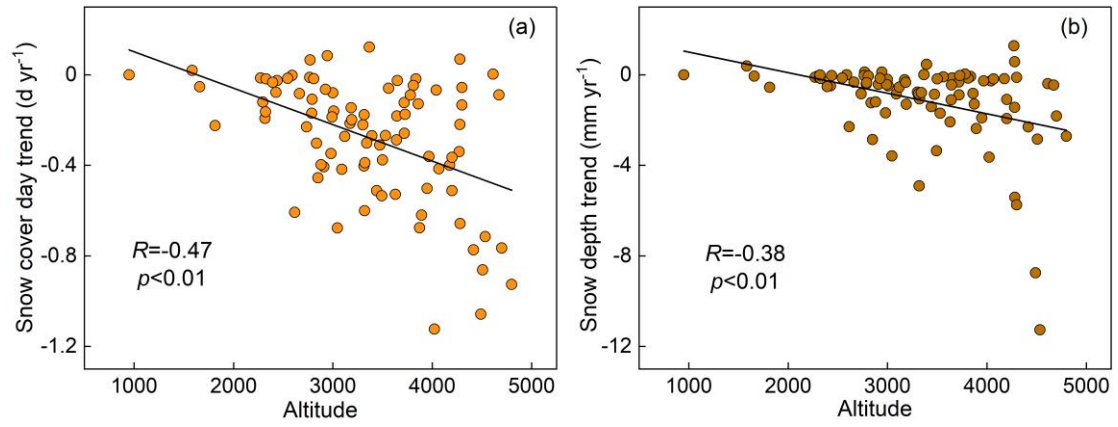

38

39 **Fig. S3.** The relationships between the trends in (a) snow-cover duration and (b) snow depth with  
40 altitude.

41
